# Supplementary material for: Adverse Events and Safety Profile of the COVID-19 Vaccines in Adolescents: Safety Monitoring for Adverse Events Using Real-World Data
Source: MDPI journal article supplement (doi:10.3390/vaccines10050744), 2022-05-09
Supplement: s1 [file s1]

## Supplementary File

**Table S1.** Classification of severe AEs.

**Table S2.** Multiple regression analysis for common AEs by sex (reference: female), age (years), symptom onset (number of days), and dose series of vaccine (coding the first dose as 0 and the second dose as 1) as covariates.

Dependent variables: incidence, independent variables: sex (coding male as 1 and female as 0), age (years), symptom onset (number of days), and dose series of vaccine.

**Table S1.** Classification of severe AEs.

| Category                   | Severe AEs                                           |
|----------------------------|------------------------------------------------------|
| Central nervous disorders  | Bell's palsy                                         |
|                            | Stroke, ischemia                                     |
|                            | Stroke, hemorrhagic                                  |
|                            | Encephalitis/myelitis/encephalomyelitis              |
|                            | Cerebral venous sinus thrombosis                     |
|                            | Convulsion/seizures                                  |
|                            | Guillain–Barré syndrome                              |
|                            | Transverse myelitis                                  |
|                            | Acute disseminated encephalomyelitis                 |
| Respiratory disorders      | Narcolepsy/cataplexy                                 |
|                            | Pulmonary embolism                                   |
| Cardiac disorders          | Acute respiratory distress syndrome (ARDS)           |
|                            | Acute myocardial infarction                          |
| Gastrointestinal disorders | Myocarditis/pericarditis                             |
|                            | Appendicitis                                         |
| Hematologic disorders      | Anemia                                               |
|                            | Lymphadenopathy                                      |
|                            | Lymphopenia                                          |
|                            | Neutropenia                                          |
|                            | Other thrombosis                                     |
|                            | Thrombocytopenia                                     |
|                            | Deep vein thrombosis                                 |
| Others                     | Anaphylaxis                                          |
|                            | Multisystem inflammatory syndrome in children/adults |
|                            | Death                                                |

**Table S2.** Multiple regression analysis for common AEs by sex (reference: female), age (years), symptom onset (number of days), and dose series of vaccine (coding the first dose as 0 and the second dose as 1) as covariates.

Dependent variables: incidence, independent variables: sex (coding male as 1 and female as 0), age (years), symptom onset (number of days), and dose series of vaccine.

|                          | Dizziness             |               |          | Syncope            |                |          | Nausea                  |               |          |
|--------------------------|-----------------------|---------------|----------|--------------------|----------------|----------|-------------------------|---------------|----------|
|                          | OR                    | 95% CI        | <i>P</i> | OR                 | 95% CI         | <i>P</i> | OR                      | 95% CI        | <i>P</i> |
| Sex (M/F)                | 0.680                 | 0.597 – 0.773 | < 0.001  | 0.618              | 0.532 – 0.717  | < 0.001  | 0.755                   | 0.641 – 0.890 | 0.001    |
| Age (years)              | 1.184                 | 1.118 – 1.254 | < 0.001  | 1.119              | 1.049 – 1.195  | 0.001    | 1.055                   | 0.981 – 1.133 | 0.147    |
| Onset (days)             | 0.872                 | 0.841 – 0.905 | < 0.001  | 0.678              | 0.618 – 0.745  | < 0.001  | 0.926                   | 0.894 – 0.958 | < 0.001  |
| Dose series <sup>a</sup> | 0.574                 | 0.500 – 0.661 | < 0.001  | 0.483              | 0.407 – 0.572  | < 0.001  | 0.981                   | 0.829 – 1.160 | 0.820    |
|                          | Headache              |               |          | Pyrexia            |                |          | Chest pain              |               |          |
|                          | OR                    | 95% CI        | <i>p</i> | OR                 | 95% CI         | <i>p</i> | OR                      | 95% CI        | <i>p</i> |
| Sex (M/F)                | 0.911                 | 0.770 – 1.077 | 0.276    | 1.329              | 1.113 – 1.587  | 0.002    | 3.446                   | 2.822 – 4.207 | < 0.001  |
| Age (years)              | 0.927                 | 0.861 – 0.998 | 0.045    | 0.898              | 0.831 – 0.971  | 0.007    | 1.254                   | 1.155 – 1.361 | < 0.001  |
| Onset (days)             | 1.000                 | 0.986 – 1.014 | 0.968    | 1.012              | 1.000 – 1.025  | 0.047    | 1.020                   | 1.008 – 1.032 | 0.001    |
| Dose series <sup>a</sup> | 1.796                 | 1.518 – 2.125 | < 0.001  | 4.371              | 3.613 – 5.287  | < 0.001  | 4.626                   | 3.804 – 5.626 | < 0.001  |
|                          | Loss of consciousness |               |          | Pallor             |                |          | Unresponsive to stimuli |               |          |
|                          | OR                    | 95% CI        | <i>p</i> | OR                 | 95% CI         | <i>p</i> | OR                      | 95% CI        | <i>p</i> |
| Sex (M/F)                | 0.853                 | 0.705 – 1.033 | 0.104    | 3.593              | 0.675 – 0.993  | 0.042    | 0.640                   | 0.497 – 0.824 | 0.001    |
| Age (years)              | 1.283                 | 1.176 – 1.400 | < 0.001  | 1.037              | 1.022 – 1.212  | 0.014    | 1.137                   | 1.019 – 1.269 | 0.022    |
| Onset (days)             | 0.806                 | 0.742 – 0.876 | < 0.001  | 1.007              | 0.496 – 0.692  | < 0.001  | 0.752                   | 0.656 – 0.862 | < 0.001  |
| Dose series <sup>*</sup> | 0.602                 | 0.485 – 0.746 | < 0.001  | 1.130              | 0.374 – 0.596  | < 0.001  | 0.507                   | 0.378 – 0.679 | < 0.001  |
|                          | Fall                  |               |          | Troponin increased |                |          | Tremor                  |               |          |
|                          | OR                    | 95% CI        | <i>p</i> | OR                 | 95% CI         | <i>p</i> | OR                      | 95% CI        | <i>p</i> |
| Sex (M/F)                | 0.699                 | 0.539 – 0.908 | 0.007    | 8.711              | 5.650 – 13.431 | < 0.001  | 0.787                   | 0.589 – 1.051 | 0.104    |
| Age (years)              | 0.863                 | 0.790 – 0.942 | 0.001    | 1.441              | 1.258 – 1.650  | < 0.001  | 1.233                   | 1.083 – 1.405 | 0.002    |
| Onset (days)             | 1.104                 | 0.985 – 1.238 | 0.088    | 1.022              | 1.005 – 1.040  | 0.010    | 0.967                   | 0.926 – 1.010 | 0.128    |
| Dose series <sup>*</sup> | 0.686                 | 0.518 – 0.910 | 0.009    | 8.558              | 5.847 – 12.524 | < 0.001  | 0.843                   | 0.623 – 1.140 | 0.268    |
|                          | Urticaria             |               |          | Flushing           |                |          | Malaise                 |               |          |
|                          | OR                    | 95% CI        | <i>p</i> | OR                 | 95% CI         | <i>p</i> | OR                      | 95% CI        | <i>p</i> |
| Sex (M/F)                | 1.171                 | 0.873 – 1.572 | 0.291    | 0.869              | 0.638 – 1.184  | 0.373    | 0.967                   | 0.708 – 1.321 | 0.832    |
| Age (years)              | 0.851                 | 0.747 – 0.970 | 0.016    | 1.134              | 0.988 – 1.302  | 0.075    | 1.077                   | 0.937 – 1.237 | 0.297    |

|              |       |                  |       |       |                  |         |       |                  |       |
|--------------|-------|------------------|-------|-------|------------------|---------|-------|------------------|-------|
| Onset (days) | 1.018 | 0.997 –<br>1.039 | 0.089 | 0.673 | 0.539 –<br>0.842 | 0.001   | 1.000 | 0.972 –<br>1.028 | 0.999 |
| Dose series* | 0.798 | 0.584 –<br>1.091 | 0.157 | 0.423 | 0.286 –<br>0.627 | < 0.001 | 1.191 | 0.867 –<br>1.635 | 0.281 |

---

\*Dose series: The 1st or 2nd dose

OR: Odds Ratio, 95% CI: 95% confidence intervals, *p*: *p*-values
